# Supplementary material for: Current Status and Health Risk Assessment of Heavy Metals Contamination in Tea across China
Source: MDPI journal article supplement (doi:10.3390/toxics11080662), 2023-08-01
Supplement: s1 [file s1]

# Current Status and Health Risk Assessment of Heavy Metals Contamination in Tea across China

Chenglin Hu<sup>1,2,3</sup>, Xiuying Zhang<sup>1,\*</sup>, Nan Zhan<sup>1</sup>, Youcun Liu<sup>4,\*</sup>

<sup>1</sup> International Institute for Earth System Science, Nanjing University, Nanjing 210023, China

<sup>2</sup> Key Laboratory of Urban Land Resources Monitoring and Simulation, Ministry of Natural Resources, Shenzhen 518000, China

<sup>3</sup> Jiangsu Center for Collaborative Innovation in Geographical Information Resource Development and Application, Nanjing 210023, China

<sup>4</sup> School of Geography and Tourism, Jiaying University, Meizhou 514015, China

\*Correspondence: zhangxy@nju.edu.cn (X.Z.); liuyoucun@hotmail.com (Y.L.)

**Table S1** Published papers on Heavy metals concentrations in tea collected in this study

| <b>Num-<br/>ber</b> | <b>Reference</b>                                                                                                              | <b>Journal</b>                           | <b>Publish<br/>year</b> |
|---------------------|-------------------------------------------------------------------------------------------------------------------------------|------------------------------------------|-------------------------|
| 1.                  | Investigation and analysis of heavy metals and rare earth elements content in 2 kinds of Chinese holly leaf                   | Journal of Food Safety and Quality       | 2017                    |
| 2.                  | Drinking safety evaluation of 3 kinds of mulberry leaf dark tea                                                               | Science of Sericulture                   | 2019                    |
| 3.                  | Investigation of heavy metals content and pesticide residues in 4 kinds of herb teas                                          | Journal of Food Safety and Quality       | 2016                    |
| 4.                  | Measurement and analysis of harmful elements and pesticide residues in seven different types of chrysanthemum                 | Cereal and Food Industry                 | 2020                    |
| 5.                  | Investigation and analysis of heavy metal pollution in tea in Jiangxi province from 2014 to 2016                              | Experimental and Laboratory Medicine     | 2020                    |
| 6.                  | AAS determined the heavy metal content in Wuzhi Shan Kuding tea                                                               | Food Engineering                         | 2012                    |
| 7.                  | Health risk assessment of heavy metals in soil-tea system from Tieguanyin Tea Garden of Anxi County                           | Food Industry                            | 2021                    |
| 8.                  | Analysis of heavy metal content in Paeoniae Radix Alba at Bozhou                                                              | Journal of West Anhui University         | 2014                    |
| 9.                  | Analysis of heavy metal content in Shangluo tea leaves in different origins and harvest seasons                               | Shaanxi Journal of Agricultural Sciences | 2015                    |
| 10.                 | Comparative study on the contents of heavy metals in marigold flowers and soil from different producing areas                 | China Food Additives                     | 2020                    |
| 11.                 | Changes in tea biochemical indexes and soil physicochemical properties at different altitude ranges of Lushan Mountain        | Journal of Anhui Agricultural University | 2017                    |
| 12.                 | Analysis of the heavy metal contents in different teas and tea water                                                          | Journal of Jilin Medical College         | 2015                    |
| 13.                 | Tea quality and safety risk assessment analysis—Take Tongren City as an example                                               | Cultivation and breeding                 | 2018                    |
| 14.                 | Analysis and hazard evaluation of aluminium, lead, arsenic, mercury, chromium and cadmium content in tea                      | Journal of Food Safety and Quality       | 2021                    |
| 15.                 | A study on the contents of Iron, Zinc, Copper in common Tea leaves                                                            | Journal of Quanzhou Normal University    | 2017                    |
| 16.                 | Determination and analysis of heavy metal elements lead, chromium, cadmium, and arsenic mercury in tea leaves in Chizhou City | South China Agriculture                  | 2019                    |
| 17.                 | Survey on the content of metal elements in the black Tea produced in Duyun                                                    | Guangzhou Chemical Industry              | 2015                    |
| 18.                 | Pollution evaluation of heavy metals in soil of tea plantations and tea at Emeishan and Jiajiang                              | Journal of Anhui Agriculture             | 2016                    |
| 19.                 | Determination of 10 Kinds of harmful elements in Fanjing mountain Green Tea                                                   | Food Research And Development            | 2017                    |
| 20.                 | Determination of heavy metal content and research on enrichment of tea cultivars in Fujian Area                               | Modern agricultural technology           | 2019                    |
| 21.                 | Study on heavy metal content in four kinds of tea in Fujian Province                                                          | Anhui Agriculture Science Bulletin       | 2018                    |
| 22.                 | Eco-geochemical characteristics of the Tieguanyin tea gardens in Fujian Province                                              | Geology in China                         | 2015                    |
| 23.                 | Analysis of 17 kinds of inorganic elements and 5 kinds of heavy                                                               | Food Safety Guide                        | 2018                    |

|     |                                                                                                                                                    |                                                         |      |
|-----|----------------------------------------------------------------------------------------------------------------------------------------------------|---------------------------------------------------------|------|
|     | metal safety evaluation in Guzhang Maojian and 3 kinds of alternative tea                                                                          |                                                         |      |
| 24. | Study on the remediation effect and environmental benefits of ornamental plants on heavy metal soil:A case study of Kaifeng City chrysanthemum     | Environmental Chemistry                                 | 2020 |
| 25. | Studies on Composition and Acute Toxicity Test of Loquat Flower Tea                                                                                | Southeast Horticulture                                  | 2016 |
| 26. | Research of Pollution and Enrichment of Heavy Metal in Soil and Tea in Typical Tea Producing Areas of Guizhou Province                             | Environmental Science&Technology                        | 2012 |
| 27. | Heavy metal accumulation and leaching characteristics of Niaowang tea in Guizhou                                                                   | Guangdong Agricultural Sciences                         | 2013 |
| 28. | Analysis of Trace Elements in Niaowang Tea from Guizhou Province                                                                                   | Guizhou Science                                         | 2012 |
| 29. | Monitoring and Pollution Assessment of Heavy Metals in Soil and Tea in Shiqiantai Tea Producing Area of Guizhou Province                           | Journal of Agricultural Catastropholgy                  | 2020 |
| 30. | Analysis of trace elements and heavy metal components in different parts of two kinds of golden flower tea native to Guizhou                       | Agriculture and Technology                              | 2020 |
| 31. | Distribution of Heavy Metals in Soil and Tea from Yunwu Tea Area in Guizhou Province and Diffusion Characteristics of Heavy Metals in Tea Infusion | Food Science                                            | 2013 |
| 32. | Evaluation of heavy metals and rare-earth elements in famous black teas at home and abroad                                                         | Journal of Food Science and Technology                  | 2017 |
| 33. | Investigation of heavy metal content of different types of tea in Hunan Province and its pollution evaluation                                      | Zhejiang Agricultural Sciences                          | 2020 |
| 34. | Analysis of the current situation of pesticide residues and heavy metal pollution in tea in Hunan Province                                         | China Food Safety                                       | 2021 |
| 35. | The cadmium pollution investigation of tea trees and soil in northeastern Hunan province tea gardens                                               | Chinese Journal of Health Inspection                    | 2015 |
| 36. | Study on lead and cadmium pollution of tea heavy metals in northeast Hunan Province                                                                | Master's degree thesis of Hunan Agricultural University | 2015 |
| 37. | Study on the contents of heavy metals in whole Huai Chrysanthemum                                                                                  | Applied Chemical Industry                               | 2016 |
| 38. | Health risk assessment and extraction behavior of heavy metals in local tea of Huangshan                                                           | Food Industry Technology                                | 2017 |
| 39. | Comparative analysis of the contents of three heavy metal elements Cr, Ni, Co in Jiangxi Famous Teas                                               | Acta Agriculturae Universitatis Jiangxiensis            | 2020 |
| 40. | Pollution evaluation of heavy metals in tea and soil of tea plantations in Jinghong City                                                           | Journal of Anhui Agriculture Science                    | 2011 |
| 41. | Analysis on mineral elements of camellia sinensis plantations in the Qingshuijiang of Leishan County                                               | Journal of Sichuan Agricultural University              | 2017 |
| 42. | Health risk assessment of fluorine and heavy metals in LiuPaoTea                                                                                   | Food & Fermentation Technology                          | 2017 |
| 43. | Concentrations and health risk assessment of heavy metals in tea garden soil and tea-leaf from a mine county in central Fujian                     | China Environmental Science                             | 2018 |

|     |                                                                                                                                       |                                                                 |      |
|-----|---------------------------------------------------------------------------------------------------------------------------------------|-----------------------------------------------------------------|------|
|     | province                                                                                                                              |                                                                 |      |
| 44. | A case study of cadmium distribution in soil-tea plant-tea soup system in central Fujian province and relative health risk assessment | Journal of Tea Science                                          | 2018 |
| 45. | Analysis of the content of lead and cadmium in jasmine tea                                                                            | Fujian tea                                                      | 2016 |
| 46. | Determination of seven trace elements in Loquat scented Tea                                                                           | Technology & Development of Chemical Industry                   | 2017 |
| 47. | Determination and analysis of chemical compositions on dandelion tea and leaves                                                       | Science and Technology of Food Industry                         | 2014 |
| 48. | Determination and risk assessment of heavy metal elements Arsenic, Lead, Cadmium, Chromium, Mercury And Copper in Pu'er Tea           | Modern Food                                                     | 2020 |
| 49. | Concentrations and diffusion characteristics of heavy metals in green tea samples from urban markets in Guizhou Province              | Modern Food Science and Technology                              | 2020 |
| 50. | Regional differences of heavy metals in soil and tea in tea areas of South Guizhou                                                    | Guizhou Agriculture Science                                     | 2012 |
| 51. | The main tea producing areas in Qianxi prefecture and evaluation of Lead, Copper, Arsenic content determination                       | Modern Food                                                     | 2017 |
| 52. | Study on the morphological distribution and bioavailability of heavy metals in soil of green tea gardens in Rizhao City               | Master's thesis of Qufu Normal University                       | 2018 |
| 53. | Analysis of tea quality and assessment of heavy metal content status in tea plantations of southern Shaanxi Province, China           | Transactions of the Chinese Society of Agricultural Engineering | 2020 |
| 54. | Analysis and pollution evaluation of soil heavy metal content in tea gardens in Xixiang County, Shaanxi Province                      | Shaanxi Journal of Agriculture Sciences                         | 2017 |
| 55. | Study on content and distribution characteristics of heavy metals elements in tea and soil of Shangluo                                | Tianjin Agricultural Sciences                                   | 2013 |
| 56. | Enrichment characteristics of metal elements in leaves from four species of yellow flower camellia                                    | Guihaia                                                         | 2016 |
| 57. | Heavy metal content of Tieguanyin tea leaves and their health risk assessment                                                         | Journal of Jilin University(Earth Science Edition)              | 2015 |
| 58. | Wuzhou Liupao tea soil raw materials tea and finished tea heavy metal content monitoring and safety evaluation                        | Agriculture and Technology                                      | 2016 |
| 59. | Contents and enrichment coefficients of heavy metals in sediment and lotus grown in ponds at downtown Wuyishan city                   | Fujian Journal of Agricultural Sciences                         | 2018 |
| 60. | Factors Affecting Bioavailability of Chromium, Zinc and Nickel in Soil at Wuyi Rock Tea Plantations                                   | Fujian Journal of Agricultural Sciences                         | 2019 |
| 61. | Evaluation of the quality of green tea products and their pollution status in southwest China                                         | Southwest China Journal of Agricultural Sciences                | 2000 |
| 62. | Content of rare earth and heavy metal elements in xinyang maojian tea and their risk assessment                                       | Guizhou Agricultural Sciences                                   | 2017 |
| 63. | Investigation of tea's heavy metal pollution and correlation with soil in Ya'an                                                       | Sichuan Agricultural University Master's degree Dissertation    | 2014 |
| 64. | Investigation and evaluation of heavy metals in tea of FengHuang Mountain tea gardens in east Guangdong Province                      | Environmental Science & Technology                              | 2010 |
| 65. | Heavy metal pollution of agricultural products:present situation in                                                                   | Chinese Agricultural Science Bulletin                           | 2017 |

|     |                                                                                                                                                                                |                                                       |      |
|-----|--------------------------------------------------------------------------------------------------------------------------------------------------------------------------------|-------------------------------------------------------|------|
|     | some areas of Yunnan                                                                                                                                                           |                                                       |      |
| 66. | Investigation on heavy metal content in large leaf species of Pu'er Tea in Dali, Yunnan Province                                                                               | Journal of Kunming University                         | 2017 |
| 67. | Health risk assessment of Cu, Pb, Zn, Cd, Cr and As in tea leaves from Fengqing County in Yunnan                                                                               | Journal of Kunming University                         | 2019 |
| 68. | Distribution characteristics of heavy metal content in tea leaves in different seasons from Fengqing tea plantation in Yunnan                                                  | Journal of Kunming University                         | 2021 |
| 69. | Health risk assessment of health metals in Pu'er Tea of Yunnan Menghai                                                                                                         | Journal of Kunming University                         | 2020 |
| 70. | Analysis on leaching characteristics of heavy metals in tea from Yunnan Baoshan                                                                                                | Journal of Kunming University                         | 2016 |
| 71. | Product quality analysis of Jing-mai ancient mountain Pu'er tea in Yunnan province                                                                                             | Food Research And Development                         | 2018 |
| 72. | Analysis on quantity of heavy metals and total rare earth elements in tea leaves from Yunnan Pu'er                                                                             | Journal of Kunming University                         | 2015 |
| 73. | Exposure levels of lead, selenium, arsenic and mercury in brick-teas from main producing areas in China                                                                        | Journal of Hygiene Research                           | 2017 |
| 74. | The monitoring and pollution evaluation of heavy metals in the soil and tea in tea gardens in Songyang County, Zhejiang Province, meets the national safety requirements       | Beijing Agriculture                                   | 2014 |
| 75. | The monitoring and evaluation of heavy metal contents in the tea garden soil and the tea in the typical tea garden of Zhenjiang                                                | Hubei Agricultural Sciences                           | 2014 |
| 76. | Detection of biochemical components and quality analysis of ancient tea tree black tea of zhuquesi in Ziyang population species                                                | Hubei Agricultural Sciences                           | 2020 |
| 77. | Study on nutritional components of three kinds of Fanjing mountains tea                                                                                                        | Food Research And Development                         | 2017 |
| 78. | Determination of 14 elements in five kinds of ripe Pu'er Tea and health risk assessment of heavy metals                                                                        | Journal of Yuxi Normal University                     | 2020 |
| 79. | Analysis of trace elements of 5 kinds of Anhui green tea                                                                                                                       | Journal of Anhui Tcm College                          | 1998 |
| 80. | Investigation and analysis of heavy metal pollution in tea in Jiangxi Province from 2014 to 2016                                                                               | Experimental and Laboratory Medicine                  | 2020 |
| 81. | Analysis and risk assessment of lead, cadmium, arsenic and mercury contamination in teas sold in Shandong Province in 2018                                                     | Chinese Journal of Health Inspection                  | 2021 |
| 82. | Variation patterns of five metal elements contents in crush, tear and curl black tea during manufacturing process and exploration of visual rapid detection method of Chromium | Chinese Academy of Agricultural Sciences Dissertation | 2018 |
| 83. | Determination of eight trace elements content in Pekoe tea from Lingyun County, China by flame atomic absorption spectrometric                                                 | Guangdong Chemical Engineering                        | 2015 |
| 84. | Determination of the dissolved rates of eight trace elements in seven kinds of scented teas                                                                                    | Chinese Journal of Spectroscopy Laboratory            | 2010 |
| 85. | ICP - AES for the determination of trace elements in Qingdao Laoshan green tea                                                                                                 | Chinese Journal of Spectroscopy Laboratory            | 2011 |
| 86. | Detection method of heavy metals in tea soup by ICP - AES                                                                                                                      | Environmental Science and Technology                  | 2009 |

|      |                                                                                                                          |                                                      |      |
|------|--------------------------------------------------------------------------------------------------------------------------|------------------------------------------------------|------|
| 87.  | Determination of mineral elements in two grades of three green Tea varieties by ICP - AES                                | Spectroscopy and Spectral Analysis                   | 2011 |
| 88.  | Determination of nickel in green tea by ICP – AES                                                                        | Guangzhou Chemical Industry                          | 2020 |
| 89.  | Determination of ten trace elements in eight herbal flowers and their infusions from Yunnan province, China by ICP - AES | Journal of Henan Institute of Science and Technology | 2014 |
| 90.  | ICP - MS determination of 16 elements in Suzhou Taihu Dongting Mountain black tea and tea soup                           | Quality and safety of agricultural products          | 2019 |
| 91.  | ICP - MS study of 6 methods of quantitative analysis of heavy metals in tea                                              | Analytical instruments                               | 2012 |
| 92.  | Investigation of elemental concentration and extraction rate of Green Tea by ICP - MS                                    | Hebei Journal of Industrial Science and Technology   | 2015 |
| 93.  | Determination of heavy metals in 30 Batches of Carthami Flos by ICP - MS                                                 | Guangzhou Chemical Industry                          | 2016 |
| 94.  | Determination of heavy metals and Harmful Elements in Xanthii Fructus by ICP - MS                                        | China Pharmacist                                     | 2019 |
| 95.  | Determination of 13 kinds of elements in Roselle by ICP - MS WEI Jiangchen                                               | Modern agricultural technology                       | 2019 |
| 96.  | Determination of Lead, Mercury, Cadmium, Arsenic, Copper heavy metals in weight-reducing tea by ICP - MS                 | Northern Pharmacy                                    | 2013 |
| 97.  | Determination of dissolving-out characteristics of elements in Ganpu tea by inductively coupled plasma mass spectrometry | Chemical Analysis and Meterage                       | 2019 |
| 98.  | Determination of ten metal elements in drinking water, green tea and rice by ICP - MS                                    | Food Research And Development                        | 2013 |
| 99.  | Analysis of leaching rates of 8 heavy metals in Mogan Yellow Bud Tea by Inductively Coupled Plasma Mass spectrometry     | Modern Food                                          | 2021 |
| 100. | Analysis of 9 heavy metal elements in Xinyang Maojian Tea Using Inductively Coupled Plasma Mass spectrometry             | Food Industry                                        | 2017 |
| 101. | Simultaneous determination of 18 elements in tea by ICP - MS                                                             | Modern Preventive Medicine                           | 2016 |
| 102. | ICP - MS Detection of Lead in Food, Arsenic, Mercury, Cadmium, Barium, Chromium, Silver, Nickel 8 Harmful Elements       | Food Industry                                        | 2015 |
| 103. | Determination of trace elements and harmful heavy metals in tea by ICP – OES                                             | Journal of Anhui Agricultural University             | 2021 |
| 104. | Determination of seven heavy metal elements released from green tea by ICP – OES                                         | Chemical Analysis and Meterage                       | 2014 |
| 105. | Determination of 26 mineral elements in golden tea samples by using ICP – OES and ICP – MS                               | Studies of Trace Elements and Health                 | 2013 |
| 106. | The health and quality of tea in Anhui Province and its countermeasures                                                  | Journal of Tea Business                              | 2004 |
| 107. | Preliminary analysis on chemical composition of Baojing Golden Tea                                                       | Tea Communication                                    | 2008 |
| 108. | Determination of trace elements in tea by wavelength dispersive X-ray fluorescence spectroscopy                          | Nuclear Techniques                                   | 2013 |
| 109. | Analysis of mineral elements and tea polyphenols and other active                                                        | Jiangsu Agricultural Sciences                        | 2015 |

|      |                                                                                                                          |                                                                                                                                                                       |      |
|------|--------------------------------------------------------------------------------------------------------------------------|-----------------------------------------------------------------------------------------------------------------------------------------------------------------------|------|
|      | ingredients in the tea leaves of different tea fruits intercropped                                                       |                                                                                                                                                                       |      |
| 110. | The content and enrichment characteristics of 9 kinds of mineral elements in different tea plant varieties               | Jiangsu Agricultural Sciences                                                                                                                                         | 2019 |
| 111. | The principal component analysis of metal elements in green tea                                                          | Journal of Southwest University of Science and Technology                                                                                                             | 2011 |
| 112. | Extraction rate of trace lead in green tea with different soaking conditions                                             | Chinese Journal of Food Hygiene                                                                                                                                       | 2014 |
| 113. | Effects of different mother material soils on biochemical characteristics of oolong tea                                  | Journal of Fujian Agricultural University                                                                                                                             | 1999 |
| 114. | Detection of heavy metal content in different varieties of chrysanthemum tea and analysis of dissolution rate            | Chinese Journal of Health Inspection                                                                                                                                  | 2018 |
| 115. | Analysis of the chemical component on quality of Rougui tea in different rock areas                                      | Journal of Food Safety and Quality                                                                                                                                    | 2015 |
| 116. | Determination of lead in tea by incomplete digestion-isotope dilution-inductively coupled plasma mass spectrometry       | Journal of Food Safety and Quality                                                                                                                                    | 2018 |
| 117. | Investigation of lead and chromium in tea from some markets in China                                                     | Journal of Food Safety and Quality                                                                                                                                    | 2014 |
| 118. | Determining mainly heavy metal elements and rare earth elements in Ya'an Tibetan tea by ICP - MS                         | A Dissertation Submitted to Sichuan Agricultural University in Partial Fulfillment of the Requirements for the Professional Degree of Master of Agriculture Extension | 2019 |
| 119. | Correlation analysis and evaluation of heavy metals in tea and in soil —A Case Study of Fanjiayuan Tea Farm in Miluo     | Hunan Agricultural Sciences                                                                                                                                           | 2021 |
| 120. | Determination of the content of As and Hg in tea leaves and the influence of the soaking method on their leaching amount | Cantonese tea                                                                                                                                                         | 2010 |
| 121. | The trace Elements in the tea                                                                                            | Jiangxi Chemical                                                                                                                                                      | 2004 |
| 122. | Research on the contents detection of metal elements and its extracting characteristics in tea                           | Chinese Journal of Health Inspection                                                                                                                                  | 2016 |
| 123. | Study on Simultaneous Determination of Phosphorus, Potassium, Lead, Zinc etc. altogether 17 Elements in Tea              | Food Science                                                                                                                                                          | 2006 |
| 124. | Analysis and hazard evaluation of aluminium, lead, arsenic, mercury, chromium and cadmium content in tea                 | Journal of Food Safety and Quality                                                                                                                                    | 2021 |
| 125. | Lead chrome green determination in tea by inductive coupled plasma atomic emission spectrometry                          | Journal of Anshan Normal University                                                                                                                                   | 2013 |
| 126. | Determination method comparison of lead content in tea and Its leaching rule                                             | Journal of Jiamusi University (Natural Science Edition)                                                                                                               | 2010 |
| 127. | Determination of contents of two elements of Cu, Pb in tea samples                                                       | Journal of Kaili University                                                                                                                                           | 2007 |
| 128. | Detection and analysis on the microelement of Tea                                                                        | Value Engineering                                                                                                                                                     | 2015 |
| 129. | Lixiviation of trace elements from Tea                                                                                   | The world of chemistry                                                                                                                                                | 2004 |
| 130. | Studies on techniques of rapid determining heavy metals in Tea-leaves                                                    | Food Science                                                                                                                                                          | 2004 |
| 131. | Hygienic study of harmful elements As, Ba, Cd and Pb in tea                                                              | Chinese Journal of Food Hygiene                                                                                                                                       | 2001 |

|      |                                                                                                                                                |                                                       |      |
|------|------------------------------------------------------------------------------------------------------------------------------------------------|-------------------------------------------------------|------|
| 132. | Determination of heavy metals in tea and exploring the law of solvent extraction                                                               | Food Research And Development                         | 2015 |
| 133. | Study on the leaching law of heavy metals in tea leaves                                                                                        | Chemical analytical metrology                         | 2007 |
| 134. | Study on Leaching Rate of Lead in Tea                                                                                                          | Branding and standardization                          | 2018 |
| 135. | Analysis of spatial heterogeneity of soil heavy metals in tea plantation: Case study of high quality tea garden in Jiangsu and Zhejiang        | Geographical Research                                 | 2017 |
| 136. | Determination of lead in tea by plating mercury anodic stripping voltammetry                                                                   | Science and Technology of Food Industry               | 2015 |
| 137. | A study on the contents of Iron, Zinc, Copper in common tea Leaves                                                                             | Journal of Quanzhou Normal University                 | 2017 |
| 138. | Investigation and analysis of lead and copper content in tea in Chengdu                                                                        | Journal of Sichuan Continuing Education College of MS | 1994 |
| 139. | Mineral element characteristics analysis and origin identification of Daishan Penglai Xianzhi green tea                                        | China Tea                                             | 2016 |
| 140. | Simultaneous determination of 20 elements in tea by inductively coupled plasma-mass spectrometry                                               | Journal of Food Safety and Quality                    | 2018 |
| 141. | Determination of 14 kinds of elements in roselle by inductively coupled plasma mass spectrometry                                               | Journal of Food Safety and Quality                    | 2019 |
| 142. | Analysis of trace elements content in chrysanthemum teas and their dissolution characteristics by inductively coupled plasma-mass spectrometry | Journal of Food Safety and Quality                    | 2016 |
| 143. | Determination of Trace Elements and Principal Component Analysis in Duyun Maojian Tea                                                          | Modern agricultural technology                        | 2016 |
| 144. | Determination of lead, copper, arsenic, cadmium, chromium, and cobalt in tea by end-view ICP - AES method                                      | Physical and Chemical Inspection (Chemistry Fascicle) | 2003 |
| 145. | Fanjing mountains white tea content of inorganic elements analysis                                                                             | Food Industry                                         | 2017 |
| 146. | Appraisal on environmental quality of Fanjing tea production base                                                                              | Guizhou Agricultural Sciences                         | 2010 |
| 147. | Principal component analysis, correlation and cluster analysis of 18 mineral elements in Fanjing mountains tea                                 | Natural product research and development              | 2017 |
| 148. | Analysis of nutritional components of Fanjing mountain dark tea                                                                                | Food Research And Development                         | 2020 |
| 149. | Risk evaluation of heavy metal elements contamination on “Fenghuang Dancong”Oolong Tea                                                         | Food Science                                          | 2008 |
| 150. | Discussion on the current situation of copper content of tea in Fujian and the pollution of the initial production process                     | Fujian tea                                            | 2001 |
| 151. | Lead Content and Isotopic Tracing for Soil-tea System of Some Tea Gardens in Fujian Province, China                                            | Earth and Environment                                 | 2018 |
| 152. | Fourteen kinds of elements in teas from Fujian province                                                                                        | Chinese Journal of Food Hygiene                       | 2011 |
| 153. | Comparative analysis of biochemical components and trace metal elements of different varieties of tea in Longnan, Gansu Province               | Packaging & Food Machinery                            | 2019 |
| 154. | Determination of seven microelement in green tea of three regions in Gannan                                                                    | Guangdong Weiliang Yuansu Kexue                       | 2005 |
| 155. | Determination of metal elements in extracting traits of mountain                                                                               | Journal of Anhui Agricultural                         | 2011 |



|      |                                                                                                                                                                        |                                                              |      |
|------|------------------------------------------------------------------------------------------------------------------------------------------------------------------------|--------------------------------------------------------------|------|
|      | green tea                                                                                                                                                              | University                                                   |      |
| 156. | Determination of heavy metals in tea through coprecipitation separation and enrichment combined with partial least square – Spectrophotometry                          | Analysis and Testing Technology and Instruments              | 2016 |
| 157. | ICP - MS Analysis on mineral and heavy metal elements of Hakka roasted green tea in Dongyuan, Guangdong                                                                | Guangdong Agricultural Sciences                              | 2016 |
| 158. | Analysis of trace element content and water dissolution of Guangdong Yingde black tea and green tea                                                                    | Chinese Journal of Ethnic and Folk Medicine                  | 2004 |
| 159. | Comparison of quality of Hawk tea ( <i>Litsea coreana</i> var. <i>sinensis</i> ) in four counties of Guizhou Province                                                  | Acta Agriculturae Zhejiangensis                              | 2021 |
| 160. | The analysis of mineral element content of Guizhou tea and relation with the grade of tea                                                                              | Trace Elements and Health Research                           | 1998 |
| 161. | Heavy metal content and pollution evaluation in Guizhou tea                                                                                                            | Agricultural Services                                        | 2020 |
| 162. | The chemical constituents of Laoying Tea from Guizhou                                                                                                                  | Journal of Plant Resources and Environment                   | 2001 |
| 163. | Geographical origin traceability of green tea from Fanjing Mountain Area, Tongren, Guizhou                                                                             | Food Science                                                 | 2021 |
| 164. | Studies on trace elements in green tea in northern Guangxi                                                                                                             | Journal of Youjiangf Medical College for National Minorities | 1993 |
| 165. | A comparative analysis on dissolvable rate of trace elements from Hainan Kudingcha and green tea                                                                       | Studies of Trace Elements and Health                         | 2008 |
| 166. | Pollution characteristics and health risk assessment of nine elements in commercially available Kuding and Partridge tea leaves and their infusions in Hainan Province | Practical preventive medicine                                | 2021 |
| 167. | Determination of extract and trace element content of Hanzhong green tea water                                                                                         | Journal of Tea Business                                      | 2008 |
| 168. | Investigation of nutrient and heavy metals in tea garden soil in Hangzhou                                                                                              | Chinese Agricultural Science Bulletin                        | 2017 |
| 169. | Study on the dissolution rate of trace elements of 8 kinds of tea in Honghe State                                                                                      | Henan Agricultural Sciences                                  | 2007 |
| 170. | Studies on mineral elements content in the famous green tea of Hubei                                                                                                   | Hubei Agricultural Sciences                                  | 2010 |
| 171. | The study of the contents of lead in green teas processed by two types of energy in Yichang, Hubei Province                                                            | Guangdong Weiliang Yuansu Kexue                              | 2015 |
| 172. | Analysis of ingredient and the appraisal of security of Hunan Tiancha                                                                                                  | Journal of Hunan Agricultural University (Natural Sciences)  | 2004 |
| 173. | Huzhou city sells substitute tea and green tea metal elements and rare earth elements test results                                                                     | Preventive medicine                                          | 2019 |
| 174. | Current status and health risk assessment of metal contamination in commercial tea in Huizhou City in 2019                                                             | Chinese Journal of Health Inspection                         | 2021 |
| 175. | Detection of lead, cadmium and chromium in instant tea by mixed matrix modifier-graphite furnace atomic absorption spectrometry                                        | Journal of Food Safety and Quality                           | 2015 |
| 176. | Study on determination of five trace elements in teas by flame                                                                                                         | Guangdong Weiliang Yuansu Kexue                              | 2004 |

|      |                                                                                                                 |                                                                                   |      |
|------|-----------------------------------------------------------------------------------------------------------------|-----------------------------------------------------------------------------------|------|
|      | atomization method                                                                                              |                                                                                   |      |
| 177. | Flame atomic absorption spectroscopy for the determination of trace elements in Shaanxi green tea and black tea | Chemistry & Bioengineering                                                        | 2020 |
| 178. | Determination of trace elements in tea by FAAS and FAFS                                                         | Chinese Journal of Spectroscopy Laboratory                                        | 2010 |
| 179. | Determination of Cr (III) and Cr (VI) in Tea by IC – ICP – MS based on ASE Extraction                           | Hubei Agricultural Sciences                                                       | 2017 |
| 180. | Green tea differentiation using multistatistical analysis based on content of mineral elements                  | Journal of Liaoning Shihua University                                             | 2013 |
| 181. | Identification of tea based on mineral content and support vector machines                                      | Journal of Jiangsu University (Natural Science Edition)                           | 2011 |
| 182. | Longjing tea origin traceability study based on biochemical composition and mineral elements                    | Zhejiang Agricultural Sciences                                                    | 2017 |
| 183. | Several different digestion methods and detection methods compare of determine lead content of green tea        | Metrology and testing technology                                                  | 2013 |
| 184. | The content of cu in several kinds of tea                                                                       | Journal of Yunnan University                                                      | 2013 |
| 185. | Research on the content of pb and cd in some teas                                                               | Journal of Chongqing Technology and Business University (Natural Science Edition) | 2011 |
| 186. | Analysis of pollution of heavy metal elements of several green tea in Guizhou                                   | Science and Technology of Food Industry                                           | 2011 |
| 187. | Determination of mercury in several commercially available green tea                                            | Shandong Chemical Industry                                                        | 2020 |
| 188. | Multivariate analysis of heavy metals in fresh tea leaves from Jiangxi Province                                 | Journal of Food and Biotechnology                                                 | 2012 |
| 189. | Assessment discussion on the degree of heavy metals in fresh tea leaves from Jiangxi Province                   | Food and Fermentation Industries                                                  | 2011 |
| 190. | Determination of ten kind of metal elements in different varieties of Jiangxi famous tea                        | Food & Machinery                                                                  | 2020 |
| 191. | Nutritional analysis and evaluation of chrysanthemum                                                            | Modern Food Science and Technology                                                | 2019 |
| 192. | Analysis on dissolving of metal elements in Yunnan Fengqing Tea by Immersion Time                               | Journal of Kunming University                                                     | 2016 |
| 193. | Effects of immersion temperatures on dissolving of metal elements in different tea infusions                    | Journal of Kunming University                                                     | 2017 |
| 194. | Investigation and analysis of lead residual in commercially available Pu'er tea in Kunming                      | Chinese Journal of Health Inspection                                              | 2018 |
| 195. | Eagle tea ingredient research                                                                                   | Shi Zhen Chinese medicine Chinese medicine                                        | 2006 |
| 196. | Migration and accumulation of heavy metals in Hawk Tea                                                          | Journal of Nuclear Agricultural Sciences                                          | 2016 |
| 197. | Analysis of nutrient composition of Quinoa Seedlings and Development of quinoa green tea                        | Professional master's degree thesis of Jilin Agricultural University              | 2018 |
| 198. | Trace element determination in teas and discrimination analysis for                                             | Rock and Mineral Analysis                                                         | 2006 |

|      |                                                                                                                                                                                    |                                                                                                         |      |
|------|------------------------------------------------------------------------------------------------------------------------------------------------------------------------------------|---------------------------------------------------------------------------------------------------------|------|
|      | Teas                                                                                                                                                                               |                                                                                                         |      |
| 199. | Lingyun pekoe tea is mainly a mineral element with the relationship between tea quality                                                                                            | Guangxi hot work technology                                                                             | 1997 |
| 200. | Determination of 10 kinds of elements in Liubao Tea by inductively coupled plasma mass spectrometry                                                                                | Shangdong Chemical Industry                                                                             | 2019 |
| 201. | A comparative study on the dissolution characteristics of six kinds of domestic black tea and Sri Lanka Black Tea                                                                  | Journal of Green Science and Technology                                                                 | 2017 |
| 202. | Influence factors on lead contents in Longjing Tea                                                                                                                                 | .Journal of Agro-Entironment Science                                                                    | 2004 |
| 203. | Chemical constituent's difference analysis of green tea or black tea or white tea and oolong                                                                                       | Forestry Science                                                                                        | 2011 |
| 204. | Determination of heavy metal content in green tea and extracts                                                                                                                     | Journal of Beijing Technology and Business University(Natural Science Edition)                          | 2012 |
| 205. | Study on contents of primary speciation of trace elements in green tea and red tea                                                                                                 | Chinese Journal of Spectroscopy Laboratory                                                              | 2004 |
| 206. | Analysis and distribution characteristics of 16 elements in green tea                                                                                                              | Chinese Journal of Health Engineering                                                                   | 2019 |
| 207. | Content characteristics of mineral elements and its correlation with soil nutrients and effective components in Chrysanthemum morifolium from different producing areas in Macheng | China Journal of Chinese Materia Medical                                                                | 2021 |
| 208. | Analysis of main chemical components of mengding yellow bud                                                                                                                        | Food Science                                                                                            | 2014 |
| 209. | Analysis and evaluation of nutritional components of aglossa dimidiata-Litsea coreana insect tea                                                                                   | Guangdong Agricultural Sciences                                                                         | 2013 |
| 210. | Analysis of 23 mineral elements in tea samples collected from china and japan by using ICP -AES and ICP -MS combined with a closed decomposition                                   | Spectroscopy and Spectral Analysis                                                                      | 2005 |
| 211. | Appraisal on enviromental quality of Fanjing tea production base                                                                                                                   | Guizhou Agricultural Sciences                                                                           | 2010 |
| 212. | The Problem of Lead Contamination and Its Source in Tea Leaves                                                                                                                     | Guandong Weiliang Yuansu Kexue                                                                          | 2004 |
| 213. | Research progress on the current situation of lead content in tea and its control technology                                                                                       | China Tea                                                                                               | 2008 |
| 214. | Analysis of spatial heterogeneity of soil heavy metals in tea garden based on township scale—a case study of high-quality famous tea planting area in Jiangsu and Zhejiang         | A Dissertation Submitted in Partial Fulfillment of the Requirements for the Degree of Master of Science | 2018 |
| 215. | Comparison of the quality and agricultural geological traits of "Umeng morning" tea in southern Sichuan                                                                            | Jiangsu Agricultural Sciences                                                                           | 2015 |
| 216. | The evalution for heavy metal content in the tea garden soil in west of Sichuan                                                                                                    | Journal of Agro - Environment Science                                                                   | 2005 |
| 217. | Analysis of the spatial variation and evaluation on soil fertility and heavy metal of typical green tea plantations                                                                | Chinese Academy of Agricultural Sciences Dissertation                                                   | 2015 |
| 218. | Evaluation of soil environment quality in the production regions of famous green tea in Fujian                                                                                     | Journal of Fujian Agricultural University                                                               | 1998 |
| 219. | Distribution and migration characteristics of cadmium and lead in soil-tea tree system                                                                                             | Journal of Fujian Agriculture and Forestry University(Natural Science Edition)                          | 2019 |

|      |                                                                                                                                                                  |                                                         |      |
|------|------------------------------------------------------------------------------------------------------------------------------------------------------------------|---------------------------------------------------------|------|
| 220. | Environmental quality evaluation of pollution – free Jasmine scented tea plantations in Hengxian, Guangxi                                                        | Guangxi Agricultural Sciences                           | 2009 |
| 221. | Vertical variation of heavy metals in soil of Guiding tea areas                                                                                                  | Guangdong Agricultural Sciences                         | 2014 |
| 222. | Geochemical characteristics of cultivated land in Yuqing Country, Guizhou Province and its influence on the quality of rice, tea and other agricultural products | Mineral Exploration                                     | 2020 |
| 223. | Evaluation of Heavy Metal Pollution of Tea Garden in Hubei                                                                                                       | Gansu Agricultural Science and Technology               | 2017 |
| 224. | Soil heavy metal pollution status and evaluation of typical tea gardens in Hubei Province                                                                        | China Tea                                               | 2009 |
| 225. | Characteristics of tea plantation soil environmental. Quality around the Dongting Lake in Hunan province                                                         | Master's degree thesis of Hunan Agricultural University | 2007 |
| 226. | Soil quality and safety investigation and evaluation of tea gardens in Guiding County based on GIS technology                                                    | Jiangsu Agricultural Sciences                           | 2014 |
| 227. | Soil heavy metal content and safety and quality evaluation of tea gardens in Laoshan District                                                                    | Shangdong Agricultural Sciences                         | 2009 |

**Table S2** Average daily exposure reference dose and cancer slope factor of various heavy metals

| Elements | RfD (mg/(kg·d))[1] | SF (mg/(kg·d)) [2] |
|----------|--------------------|--------------------|
| As       | 0.0003             | 1.5                |
| Cd       | 0.0010             | 15                 |
| Cr       | 0.0030             | 0.5                |
| Cu       | 0.0400             |                    |
| Hg       | 0.0003             |                    |
| Pb       | 0.0035             | 0.0085             |

**Table S3 Concentration of heavy metals and pollution rates in tea and tea plantation soils**

| Elements | Tea samples |         |           | Tea plantation soil samples |         |            |             |
|----------|-------------|---------|-----------|-----------------------------|---------|------------|-------------|
|          | Range       | Mean    | Pollution | Range                       | Mean    | Pollution  | Pollution   |
|          | (mg/kg)     | (mg/kg) | rate (%)  | (mg/kg)                     | (mg/kg) | rates 1(%) | rates 2 (%) |
| As       | 0–5.64      | 0.21    | 0.21      | 0.1–75.86                   | 12.46   | 0.44       |             |
| Cd       | 0–3.79      | 0.14    | 1.18      | 0–1.29                      | 0.16    | 6.38       | 99.80       |
| Cr       | 0.01–42.94  | 1.17    | 2.10      | 0.3–254.4                   | 58.31   | 0.95       | 100         |
| Cu       | 0–132.31    | 14.6    | 2.87      | 1.53–113.6                  | 23.36   | 1.73       |             |
| Hg       | 0–1.81      | 0.04    | 1.56      | 0.01–0.42                   | 0.17    | 12.33      | 90.40       |
| Pb       | 0–31.73     | 1.09    | 1.04      | 0.04–157.6                  | 40.36   | 0          | 99.75       |

Pollution rate 1 is calculated according to Chinese standards. Pollution rate 2 is calculated according to WHO standards.

**Table S4** Heavy metal concentration and pollution ratio in different kinds of tea

|                           |                       | Green<br>Tea | White<br>Tea | Dark<br>Tea | Black<br>Tea | Oolong<br>Tea | Scented<br>Tea | Yellow<br>Tea |
|---------------------------|-----------------------|--------------|--------------|-------------|--------------|---------------|----------------|---------------|
| As                        | Mean<br>(mg/kg)       | 0.23         | 0.31         | 0.18        | 0.11         | 0.14          | 0.34           | 0.05          |
|                           | sample<br>size        | 2732         | 50           | 716         | 608          | 343           | 334            | 20            |
|                           | Pollution<br>ratio(%) | 0            | 0            | 0           | 0            | 0             | 2.99           | 0             |
| Cd                        | Mean<br>(mg/kg)       | 0.16         | 0.13         | 0.08        | 0.07         | 0.12          | 0.21           | 0.37          |
|                           | sample<br>size        | 3121         | 62           | 679         | 602          | 369           | 404            | 20            |
|                           | Pollution<br>ratio(%) | 0.64         | 0            | 1.33        | 1.33         | 2.17          | 4.21           | 0             |
| Cr                        | Mean<br>(mg/kg)       | 1.08         | 0.69         | 1.77        | 0.61         | 0.70          | 3.61           | 0.39          |
|                           | sample<br>size        | 2832         | 49           | 750         | 616          | 449           | 192            | 15            |
|                           | Pollution<br>ratio(%) | 0.32         | 0            | 6.30        | 0.65         | 4.01          | 13.0           | 0             |
| Cu                        | Mean<br>(mg/kg)       | 14.9         | 14.2         | 14.9        | 16.3         | 13.3          | 13.4           | 14.4          |
|                           | sample<br>size        | 2810         | 54           | 657         | 467          | 527           | 342            | 24            |
|                           | Pollution<br>ratio(%) | 3.17         | 3.70         | 0.46        | 6.42         | 1.52          | 1.75           | 8.33          |
| Hg                        | Mean<br>(mg/kg)       | 0.04         | 0.09         | 0.03        | 0.03         | 0.04          | 0.06           | 0.30          |
|                           | sample<br>size        | 2465         | 41           | 596         | 465          | 171           | 281            | 7             |
|                           | Pollution<br>ratio(%) | 1.95         | 0            | 0           | 0            | 0             | 5.34           | 0             |
| Pb                        | Mean<br>(mg/kg)       | 1.17         | 0.66         | 1.10        | 0.70         | 0.81          | 1.57           | 0.84          |
|                           | sample<br>size        | 3868         | 63           | 846         | 697          | 669           | 449            | 19            |
|                           | Pollution<br>ratio(%) | 0.59         | 0            | 3.19        | 0.29         | 0.15          | 3.56           | 0             |
| Sum pollution<br>ratio(%) |                       | 6.67         | 3.70         | 11.24       | 8.69         | 7.84          | 30.88          | 8.33          |

**Table S5** The non-carcinogenic risk assessment of tea consumption for male adults in China

| Region         | HQ of As | HQ of Cd | HQ of Cr | HQ of Cu | HQ of Hg | HQ of Pb | HI     |
|----------------|----------|----------|----------|----------|----------|----------|--------|
| Heilongjiang   | 0.0006   | 0.0002   | 0.0003   | 0.0020   | 0.0001   | 0.0007   | 0.0039 |
| Xinjiang       | 0.0110   | 0.0049   | 0.0015   | 0.0080   | 0.0004   | 0.0033   | 0.0291 |
| Shanxi         | 0.0056   | 0.0022   | 0.0015   | 0.0049   | 0.0012   | 0.0041   | 0.0195 |
| Ningxia        | 0.0030   | 0.0010   | 0.0011   | 0.0080   | 0.0007   | 0.0031   | 0.0169 |
| Tibet          | 0.0302   | 0.0097   | 0.0105   | 0.0816   | 0.0070   | 0.0308   | 0.1698 |
| Shandong       | 0.0270   | 0.0025   | 0.0027   | 0.0123   | 0.0145   | 0.0119   | 0.0710 |
| Henan          | 0.0074   | 0.0035   | 0.0020   | 0.0047   | 0.0027   | 0.0043   | 0.0246 |
| Jiangsu        | 0.0060   | 0.0027   | 0.0014   | 0.0040   | 0.0018   | 0.0065   | 0.0223 |
| Anhui          | 0.0203   | 0.0090   | 0.0036   | 0.0130   | 0.0065   | 0.0117   | 0.0642 |
| Hubei          | 0.0071   | 0.0016   | 0.0010   | 0.0038   | 0.0020   | 0.0032   | 0.0187 |
| Zhejiang       | 0.0048   | 0.0011   | 0.0016   | 0.0054   | 0.0009   | 0.0054   | 0.0193 |
| Jiangxi        | 0.0037   | 0.0018   | 0.0011   | 0.0039   | 0.0016   | 0.0024   | 0.0144 |
| Hunan          | 0.0039   | 0.0035   | 0.0009   | 0.0042   | 0.0012   | 0.0035   | 0.0172 |
| Yunnan         | 0.0192   | 0.0096   | 0.0122   | 0.0163   | 0.0092   | 0.0113   | 0.0777 |
| Guizhou        | 0.0145   | 0.0071   | 0.0042   | 0.0059   | 0.0065   | 0.0081   | 0.0463 |
| Fujian         | 0.0083   | 0.0023   | 0.0016   | 0.0071   | 0.0039   | 0.0062   | 0.0292 |
| Guangxi        | 0.0028   | 0.0179   | 0.0008   | 0.0037   | 0.0009   | 0.0024   | 0.0285 |
| Guangdong      | 0.0103   | 0.0095   | 0.0035   | 0.0151   | 0.0128   | 0.0141   | 0.0653 |
| Hainan         | 0.0020   | 0.0142   | 0.0006   | 0.0014   | 0.0002   | 0.0018   | 0.0202 |
| Jilin          | 0.0012   | 0.0005   | 0.0008   | 0.0047   | 0.0004   | 0.0015   | 0.0092 |
| Liaoning       | 0.0050   | 0.0015   | 0.0012   | 0.0099   | 0.0016   | 0.0033   | 0.0227 |
| Tianjin        | 0.0037   | 0.0014   | 0.0006   | 0.0055   | 0.0019   | 0.0032   | 0.0162 |
| Qinghai        | 0.0037   | 0.0012   | 0.0013   | 0.0098   | 0.0009   | 0.0038   | 0.0207 |
| Gansu          | 0.0197   | 0.0019   | 0.0055   | 0.0109   | 0.0080   | 0.0095   | 0.0555 |
| Shaanxi        | 0.0222   | 0.0033   | 0.0037   | 0.0062   | 0.0154   | 0.0079   | 0.0586 |
| Inner Mongolia | 0.0025   | 0.0007   | 0.0013   | 0.0074   | 0.0009   | 0.0019   | 0.0147 |
| Chongqing      | 0.0174   | 0.0052   | 0.0031   | 0.0084   | 0.0046   | 0.0071   | 0.0459 |
| Hebei          | 0.0091   | 0.0027   | 0.0011   | 0.0087   | 0.0039   | 0.0063   | 0.0319 |
| Shanghai       | 0.0022   | 0.0010   | 0.0009   | 0.0049   | 0.0007   | 0.0044   | 0.0141 |
| Beijing        | 0.0078   | 0.0023   | 0.0010   | 0.0102   | 0.0022   | 0.0134   | 0.0370 |
| Taiwan         | 0.0023   | 0.0009   | 0.0084   | 0.0032   | 0.0003   | 0.0057   | 0.0207 |
| Hong Kong      | 0.0055   | 0.0015   | 0.0016   | 0.0109   | 0.0055   | 0.0058   | 0.0308 |
| Macau          | 0.0000   | 0.0000   | 0.0000   | 0.0000   | 0.0000   | 0.0000   | 0.0000 |
| Sichuan        | 0.0122   | 0.0025   | 0.0019   | 0.0074   | 0.0024   | 0.0109   | 0.0372 |
| Average        | 0.0089   | 0.0039   | 0.0025   | 0.0092   | 0.0036   | 0.0065   | 0.0345 |



**Table S6** The non-carcinogenic risk assessment of tea consumption for female adults in China

| Region         | HQ of As | HQ of Cd | HQ of Cr | HQ of Cu | HQ of Hg | HQ of Pb | HI     |
|----------------|----------|----------|----------|----------|----------|----------|--------|
| Heilongjiang   | 0.0007   | 0.0003   | 0.0003   | 0.0023   | 0.0002   | 0.0009   | 0.0045 |
| Xinjiang       | 0.0127   | 0.0057   | 0.0018   | 0.0092   | 0.0004   | 0.0038   | 0.0336 |
| Shanxi         | 0.0064   | 0.0026   | 0.0017   | 0.0057   | 0.0014   | 0.0048   | 0.0226 |
| Ningxia        | 0.0035   | 0.0011   | 0.0012   | 0.0093   | 0.0008   | 0.0036   | 0.0195 |
| Tibet          | 0.0348   | 0.0112   | 0.0122   | 0.0943   | 0.0081   | 0.0355   | 0.1962 |
| Shandong       | 0.0312   | 0.0029   | 0.0031   | 0.0142   | 0.0168   | 0.0138   | 0.0820 |
| Henan          | 0.0086   | 0.0040   | 0.0024   | 0.0054   | 0.0031   | 0.0050   | 0.0284 |
| Jiangsu        | 0.0069   | 0.0031   | 0.0017   | 0.0046   | 0.0020   | 0.0075   | 0.0258 |
| Anhui          | 0.0234   | 0.0104   | 0.0042   | 0.0150   | 0.0076   | 0.0135   | 0.0741 |
| Hubei          | 0.0082   | 0.0019   | 0.0011   | 0.0043   | 0.0024   | 0.0037   | 0.0216 |
| Zhejiang       | 0.0055   | 0.0013   | 0.0019   | 0.0063   | 0.0011   | 0.0063   | 0.0222 |
| Jiangxi        | 0.0043   | 0.0021   | 0.0012   | 0.0045   | 0.0019   | 0.0027   | 0.0167 |
| Hunan          | 0.0045   | 0.0040   | 0.0010   | 0.0049   | 0.0014   | 0.0040   | 0.0199 |
| Yunnan         | 0.0222   | 0.0110   | 0.0140   | 0.0188   | 0.0106   | 0.0131   | 0.0897 |
| Guizhou        | 0.0168   | 0.0082   | 0.0049   | 0.0068   | 0.0075   | 0.0093   | 0.0535 |
| Fujian         | 0.0096   | 0.0026   | 0.0018   | 0.0081   | 0.0045   | 0.0072   | 0.0337 |
| Guangxi        | 0.0033   | 0.0207   | 0.0009   | 0.0043   | 0.0011   | 0.0028   | 0.0330 |
| Guangdong      | 0.0119   | 0.0110   | 0.0041   | 0.0174   | 0.0148   | 0.0163   | 0.0755 |
| Hainan         | 0.0023   | 0.0165   | 0.0006   | 0.0016   | 0.0002   | 0.0021   | 0.0233 |
| Jilin          | 0.0014   | 0.0006   | 0.0010   | 0.0055   | 0.0004   | 0.0017   | 0.0106 |
| Liaoning       | 0.0058   | 0.0018   | 0.0014   | 0.0114   | 0.0018   | 0.0039   | 0.0262 |
| Tianjin        | 0.0043   | 0.0016   | 0.0006   | 0.0063   | 0.0022   | 0.0037   | 0.0187 |
| Qinghai        | 0.0043   | 0.0014   | 0.0015   | 0.0113   | 0.0010   | 0.0044   | 0.0240 |
| Gansu          | 0.0227   | 0.0022   | 0.0064   | 0.0126   | 0.0092   | 0.0110   | 0.0641 |
| Shaanxi        | 0.0257   | 0.0038   | 0.0043   | 0.0071   | 0.0177   | 0.0091   | 0.0677 |
| Inner Mongolia | 0.0029   | 0.0009   | 0.0015   | 0.0085   | 0.0011   | 0.0021   | 0.0169 |
| Chongqing      | 0.0201   | 0.0060   | 0.0036   | 0.0098   | 0.0054   | 0.0082   | 0.0530 |
| Hebei          | 0.0105   | 0.0032   | 0.0013   | 0.0101   | 0.0045   | 0.0073   | 0.0369 |
| Shanghai       | 0.0025   | 0.0011   | 0.0011   | 0.0056   | 0.0008   | 0.0051   | 0.0162 |
| Beijing        | 0.0091   | 0.0027   | 0.0011   | 0.0118   | 0.0026   | 0.0155   | 0.0427 |
| Taiwan         | 0.0026   | 0.0010   | 0.0097   | 0.0037   | 0.0003   | 0.0066   | 0.0239 |
| Hong Kong      | 0.0063   | 0.0017   | 0.0018   | 0.0126   | 0.0064   | 0.0067   | 0.0355 |
| Macau          | 0.0000   | 0.0000   | 0.0000   | 0.0000   | 0.0000   | 0.0000   | 0.0000 |
| Sichuan        | 0.0141   | 0.0029   | 0.0022   | 0.0085   | 0.0028   | 0.0126   | 0.0430 |
| Average        | 0.0103   | 0.0045   | 0.0029   | 0.0106   | 0.0042   | 0.0075   | 0.0399 |

**Table S7** The carcinogenic risk assessment of tea consumption for male adults in China

| Region         | Risk of As | Risk of Cd | Risk of Cr | Risk of Pb | Total Risk |
|----------------|------------|------------|------------|------------|------------|
| Heilongjiang   | 2.61E-07   | 3.36E-06   | 3.78E-07   | 2.23E-08   | 4.02E-06   |
| Xinjiang       | 4.95E-06   | 7.40E-05   | 2.32E-06   | 9.69E-08   | 8.13E-05   |
| Shanxi         | 2.51E-06   | 3.32E-05   | 2.21E-06   | 1.23E-07   | 3.81E-05   |
| Ningxia        | 1.36E-06   | 1.46E-05   | 1.59E-06   | 9.18E-08   | 1.77E-05   |
| Tibet          | 1.36E-05   | 1.46E-04   | 1.58E-05   | 9.15E-07   | 1.76E-04   |
| Shandong       | 1.22E-05   | 3.72E-05   | 4.04E-06   | 3.55E-07   | 5.38E-05   |
| Henan          | 3.33E-06   | 5.18E-05   | 3.07E-06   | 1.29E-07   | 5.83E-05   |
| Jiangsu        | 2.69E-06   | 4.01E-05   | 2.16E-06   | 1.94E-07   | 4.51E-05   |
| Anhui          | 9.13E-06   | 1.35E-04   | 5.42E-06   | 3.49E-07   | 1.50E-04   |
| Hubei          | 3.20E-06   | 2.46E-05   | 1.47E-06   | 9.50E-08   | 2.94E-05   |
| Zhejiang       | 2.14E-06   | 1.68E-05   | 2.43E-06   | 1.61E-07   | 2.16E-05   |
| Jiangxi        | 1.66E-06   | 2.72E-05   | 1.60E-06   | 7.03E-08   | 3.05E-05   |
| Hunan          | 1.75E-06   | 5.24E-05   | 1.32E-06   | 1.04E-07   | 5.56E-05   |
| Yunnan         | 8.65E-06   | 1.43E-04   | 1.82E-05   | 3.36E-07   | 1.71E-04   |
| Guizhou        | 6.53E-06   | 1.06E-04   | 6.37E-06   | 2.40E-07   | 1.20E-04   |
| Fujian         | 3.72E-06   | 3.38E-05   | 2.34E-06   | 1.84E-07   | 4.01E-05   |
| Guangxi        | 1.28E-06   | 2.68E-04   | 1.20E-06   | 7.14E-08   | 2.71E-04   |
| Guangdong      | 4.62E-06   | 1.43E-04   | 5.29E-06   | 4.20E-07   | 1.54E-04   |
| Hainan         | 8.83E-07   | 2.14E-04   | 8.31E-07   | 5.44E-08   | 2.15E-04   |
| Jilin          | 5.53E-07   | 7.27E-06   | 1.26E-06   | 4.39E-08   | 9.12E-06   |
| Liaoning       | 2.27E-06   | 2.31E-05   | 1.86E-06   | 9.95E-08   | 2.74E-05   |
| Tianjin        | 1.67E-06   | 2.12E-05   | 8.31E-07   | 9.41E-08   | 2.38E-05   |
| Qinghai        | 1.69E-06   | 1.81E-05   | 1.96E-06   | 1.14E-07   | 2.19E-05   |
| Gansu          | 8.86E-06   | 2.87E-05   | 8.26E-06   | 2.84E-07   | 4.61E-05   |
| Shaanxi        | 9.99E-06   | 4.92E-05   | 5.58E-06   | 2.34E-07   | 6.50E-05   |
| Inner Mongolia | 1.11E-06   | 1.12E-05   | 1.95E-06   | 5.51E-08   | 1.43E-05   |
| Chongqing      | 7.84E-06   | 7.76E-05   | 4.66E-06   | 2.12E-07   | 9.03E-05   |
| Hebei          | 4.11E-06   | 4.11E-05   | 1.63E-06   | 1.89E-07   | 4.70E-05   |
| Shanghai       | 9.88E-07   | 1.44E-05   | 1.41E-06   | 1.32E-07   | 1.69E-05   |
| Beijing        | 3.53E-06   | 3.52E-05   | 1.46E-06   | 4.00E-07   | 4.06E-05   |
| Taiwan         | 1.02E-06   | 1.30E-05   | 1.26E-05   | 1.70E-07   | 2.67E-05   |
| Hong Kong      | 2.47E-06   | 2.27E-05   | 2.35E-06   | 1.72E-07   | 2.77E-05   |
| Macau          | 0.00E+00   | 0.00E+00   | 0.00E+00   | 0.00E+00   | 0.00E+00   |
| Sichuan        | 5.48E-06   | 3.75E-05   | 2.86E-06   | 3.23E-07   | 4.61E-05   |
| Average        | 4.00E-06   | 5.78E-05   | 3.73E-06   | 1.92E-07   | 6.57E-05   |

**Table S8** The carcinogenic risk assessment of tea consumption for female adults in China

| Region         | Risk of As | Risk of Cd | Risk of Cr | Risk of Pb | Total Risk |
|----------------|------------|------------|------------|------------|------------|
| Heilongjiang   | 3.01E-07   | 3.88E-06   | 4.37E-07   | 2.58E-08   | 4.64E-06   |
| Xinjiang       | 5.72E-06   | 8.55E-05   | 2.68E-06   | 1.12E-07   | 9.40E-05   |
| Shanxi         | 2.90E-06   | 3.84E-05   | 2.56E-06   | 1.42E-07   | 4.40E-05   |
| Ningxia        | 1.57E-06   | 1.69E-05   | 1.83E-06   | 1.06E-07   | 2.04E-05   |
| Tibet          | 1.57E-05   | 1.68E-04   | 1.83E-05   | 1.06E-06   | 2.04E-04   |
| Shandong       | 1.40E-05   | 4.30E-05   | 4.66E-06   | 4.11E-07   | 6.21E-05   |
| Henan          | 3.85E-06   | 5.98E-05   | 3.55E-06   | 1.49E-07   | 6.74E-05   |
| Jiangsu        | 3.11E-06   | 4.63E-05   | 2.49E-06   | 2.24E-07   | 5.22E-05   |
| Anhui          | 1.05E-05   | 1.56E-04   | 6.26E-06   | 4.03E-07   | 1.73E-04   |
| Hubei          | 3.70E-06   | 2.84E-05   | 1.70E-06   | 1.10E-07   | 3.39E-05   |
| Zhejiang       | 2.47E-06   | 1.95E-05   | 2.81E-06   | 1.86E-07   | 2.49E-05   |
| Jiangxi        | 1.91E-06   | 3.14E-05   | 1.85E-06   | 8.13E-08   | 3.52E-05   |
| Hunan          | 2.02E-06   | 6.06E-05   | 1.52E-06   | 1.20E-07   | 6.42E-05   |
| Yunnan         | 1.00E-05   | 1.66E-04   | 2.11E-05   | 3.88E-07   | 1.97E-04   |
| Guizhou        | 7.54E-06   | 1.23E-04   | 7.35E-06   | 2.77E-07   | 1.38E-04   |
| Fujian         | 4.30E-06   | 3.91E-05   | 2.71E-06   | 2.13E-07   | 4.63E-05   |
| Guangxi        | 1.47E-06   | 3.10E-04   | 1.38E-06   | 8.25E-08   | 3.13E-04   |
| Guangdong      | 5.34E-06   | 1.65E-04   | 6.11E-06   | 4.85E-07   | 1.77E-04   |
| Hainan         | 1.02E-06   | 2.47E-04   | 9.60E-07   | 6.28E-08   | 2.49E-04   |
| Jilin          | 6.39E-07   | 8.39E-06   | 1.45E-06   | 5.07E-08   | 1.05E-05   |
| Liaoning       | 2.62E-06   | 2.67E-05   | 2.15E-06   | 1.15E-07   | 3.16E-05   |
| Tianjin        | 1.92E-06   | 2.45E-05   | 9.60E-07   | 1.09E-07   | 2.75E-05   |
| Qinghai        | 1.95E-06   | 2.09E-05   | 2.27E-06   | 1.31E-07   | 2.53E-05   |
| Gansu          | 1.02E-05   | 3.32E-05   | 9.54E-06   | 3.28E-07   | 5.33E-05   |
| Shaanxi        | 1.15E-05   | 5.68E-05   | 6.45E-06   | 2.71E-07   | 7.51E-05   |
| Inner Mongolia | 1.28E-06   | 1.29E-05   | 2.26E-06   | 6.37E-08   | 1.65E-05   |
| Chongqing      | 9.06E-06   | 8.96E-05   | 5.38E-06   | 2.45E-07   | 1.04E-04   |
| Hebei          | 4.75E-06   | 4.75E-05   | 1.88E-06   | 2.18E-07   | 5.43E-05   |
| Shanghai       | 1.14E-06   | 1.66E-05   | 1.63E-06   | 1.52E-07   | 1.95E-05   |
| Beijing        | 4.07E-06   | 4.06E-05   | 1.69E-06   | 4.62E-07   | 4.69E-05   |
| Taiwan         | 1.18E-06   | 1.50E-05   | 1.45E-05   | 1.96E-07   | 3.09E-05   |
| Hong Kong      | 2.85E-06   | 2.62E-05   | 2.71E-06   | 1.99E-07   | 3.20E-05   |
| Macau          | 0.00E+00   | 0.00E+00   | 0.00E+00   | 0.00E+00   | 0.00E+00   |
| Sichuan        | 6.34E-06   | 4.33E-05   | 3.31E-06   | 3.73E-07   | 5.33E-05   |
| Average        | 4.62E-06   | 6.68E-05   | 4.31E-06   | 2.22E-07   | 7.59E-05   |

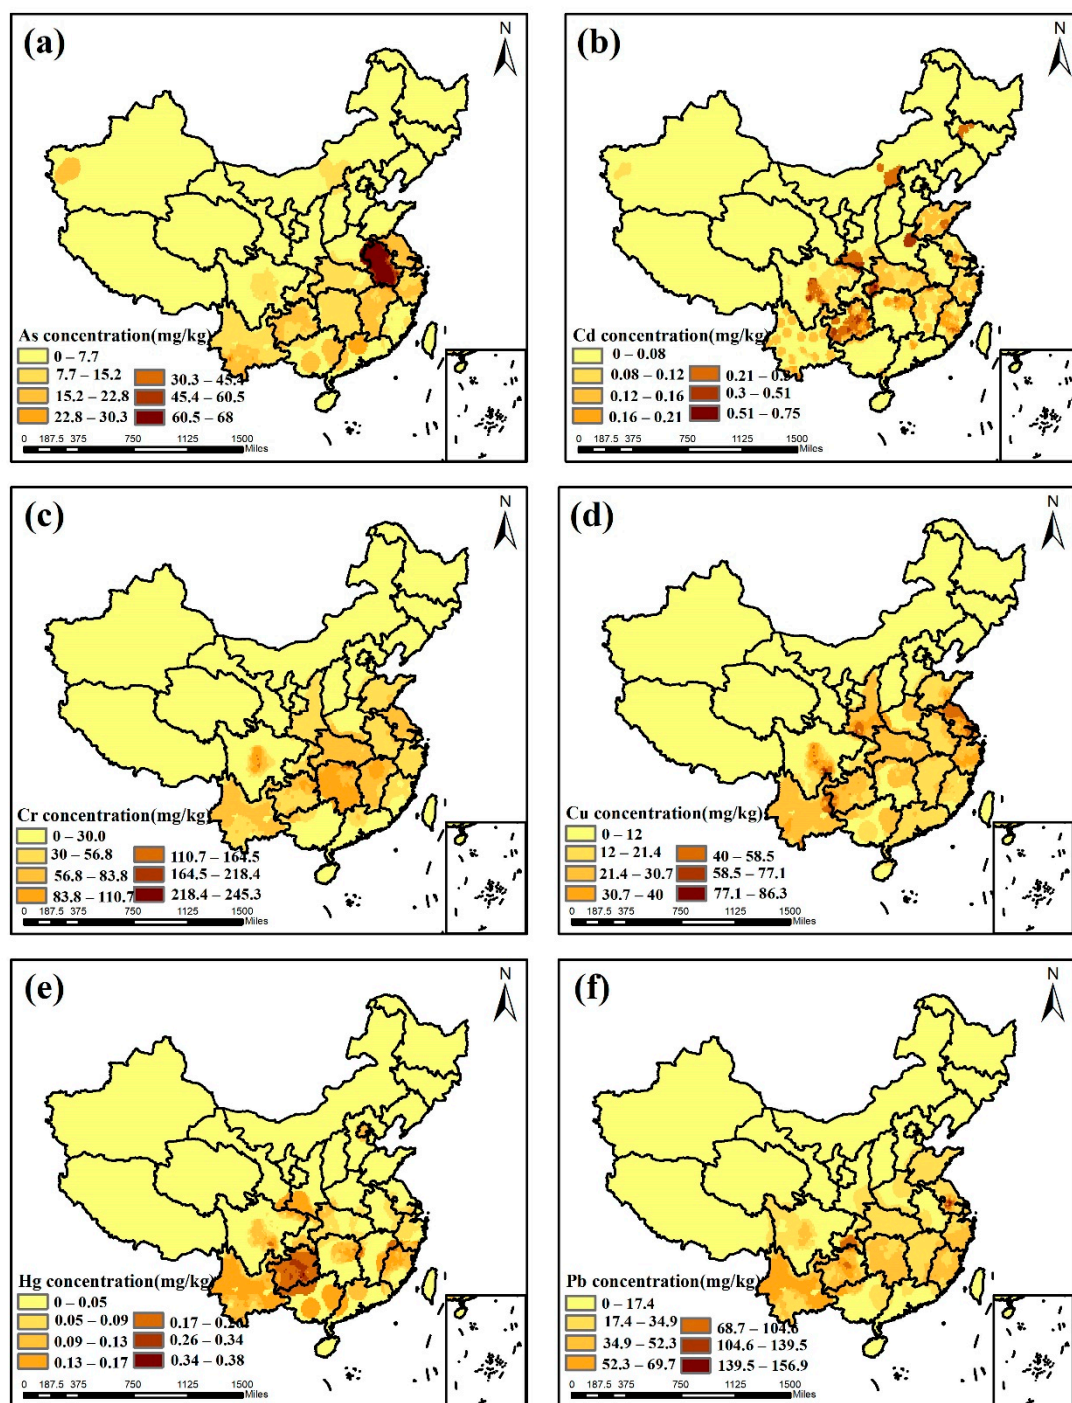

Figure S1. Spatial distribution of heavy metals concentrations in tea plantation soils. (a): As; (b): Cd; (c): Cr; (d): Cu; (e): Hg; (f): Pb.

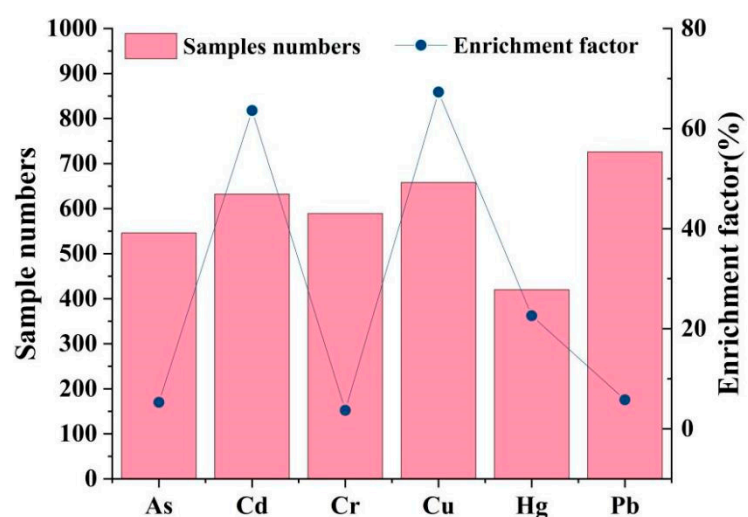

Figure S2. The number of samples from the same location used for different heavy metals and the calculated EF averages.

## References

1. USEPA. Regional Screening Level (RSL) Summary Table, Washington, DC, USA, 2015.
2. Zhang, L.e.; Mo, Z.; Qin, J.; Li, Q.; Wei, Y.; Ma, S.; Xiong, Y.; Liang, G.; Qing, L.; Chen, Z. et al. Change of water sources reduces health risks from heavy metals via ingestion of water, soil, and rice in a riverine area, South China. *Sci. Total. Environ.* **2015**, 530-531,163-170.
